# Supplementary material for: PKC-independent PI3K signalling diminishes PKC inhibitor sensitivity in uveal melanoma
Source: PubMed Central journal article supplement (PMC10902289; doi:10.1038/s41389-024-00511-8), 2024-02-28
Supplement: 41389_2024_511_MOESM1_ESM.pdf [file 41389_2024_511_MOESM1_ESM.pdf]

Figure S1

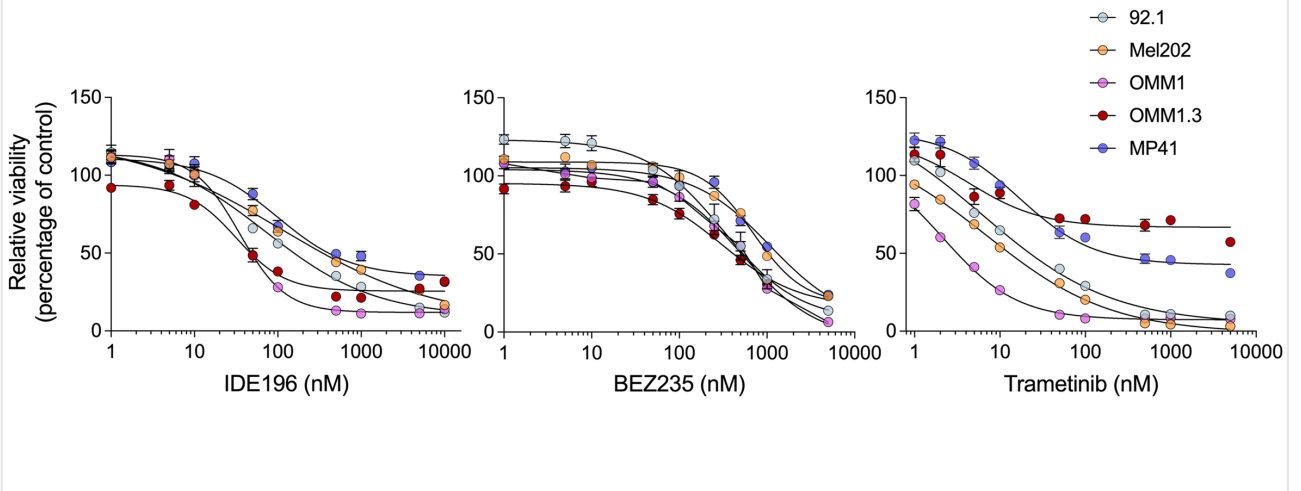

**Figure S1: Drug response curves in uveal melanoma cell lines**

Indicated uveal melanoma cells were treated with the indicated doses of IDE196, BEZ235 or trametinib for 72h (relative to DMSO-treated controls; mean  $\pm$ SEM; n $\geq$ 4)

Figure S2

A

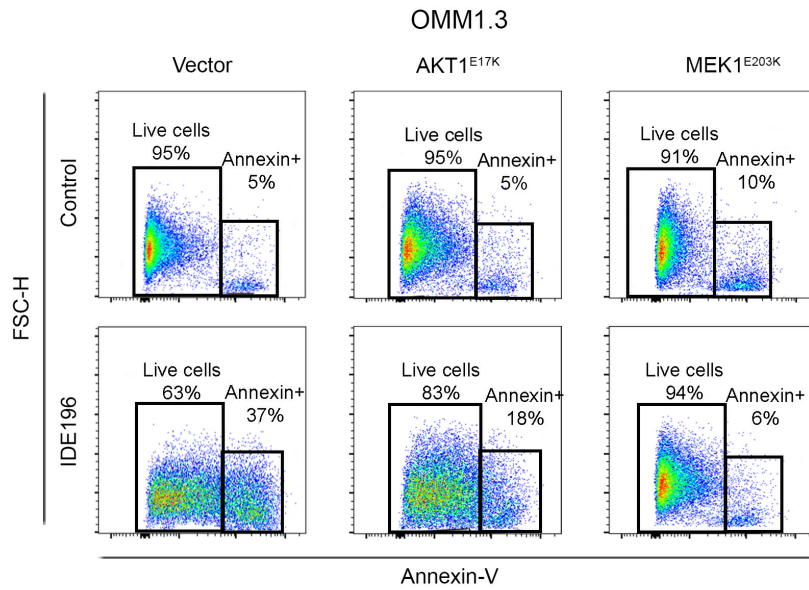

B

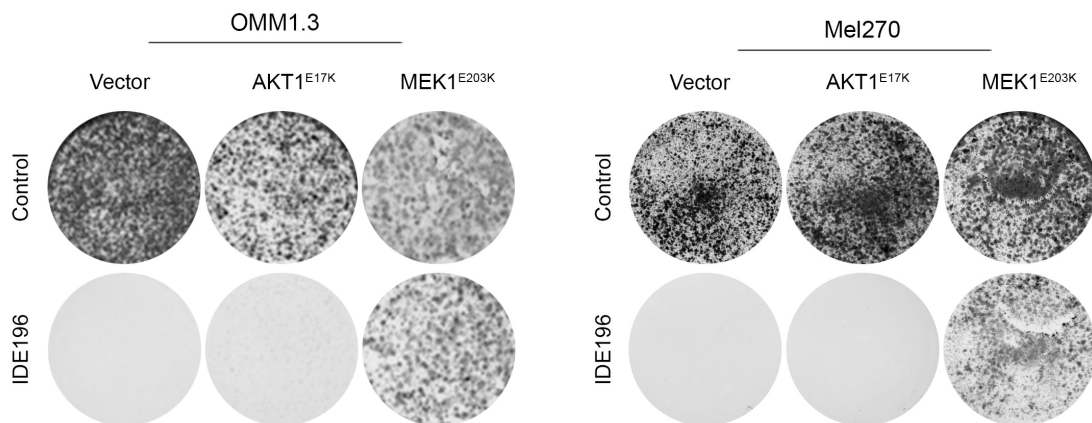

**Figure S2: MAPK and PI3K reactivation overrides PKC inhibitor response in UM cells**

A) Representative scatterplot showing percentage of Annexin V-positive OMM1.3 UM cells transduced with lentiviral constructs AKT1<sup>E17K</sup>, MEK1<sup>E203K</sup> or empty vector. Cells were stained for Annexin V, 72 h post treatment with vehicle control or 1  $\mu$ M IDE196. FSC-H, forward scatter-height,

B) Representative images of colony formation in AKT1<sup>E17K</sup>- and MEK1<sup>E203K</sup>- transduced OMM1.3 and Mel270 UM cells. Cells were stained with 0.1% crystal violet 7 – 10 days after treatment with vehicle control or 1  $\mu$ M IDE196.

Figure S3

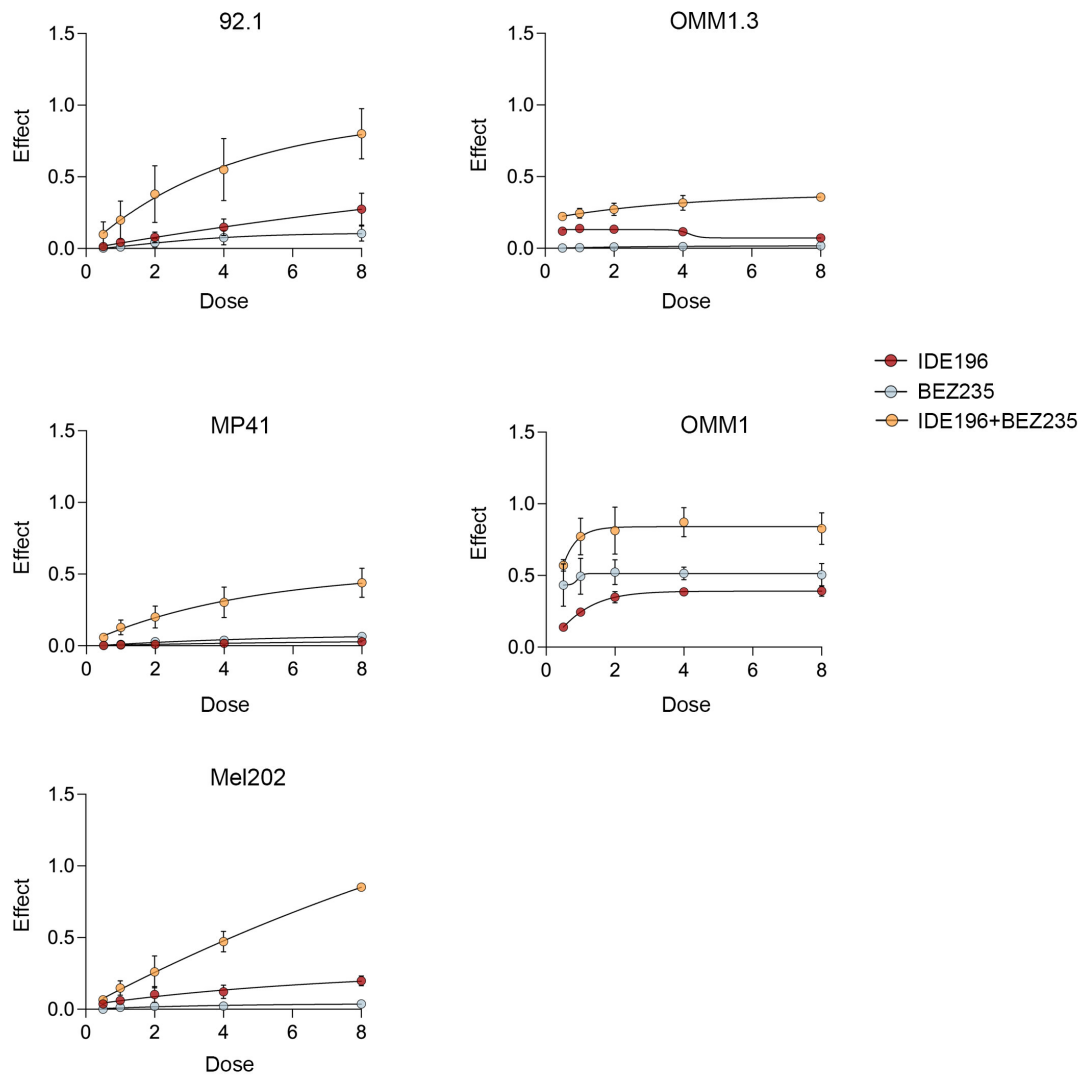

**Figure S3: Dose-effect curves derived from GNAQ/GNA11-mutant UM cells treated with PKC and/or PI3K/mTOR inhibitors**

Dose effect curves of five UM cell lines showing responses to concurrent IDE196 and BEZ235 inhibition. Sub-G1 data are derived from 3 – 4 independent experiments (mean  $\pm$  SD). The fraction affected values (y-axis) were calculated as average sub-G1 fraction of drug-treated cells – average sub-G1 from control-treated cells, from 3 – 4 independent experiments per cell line. IDE196 dose ( $\mu$ M) is shown on the x-axis and BEZ235 was used at 0.25x the IDE196 dose.

Figure S4

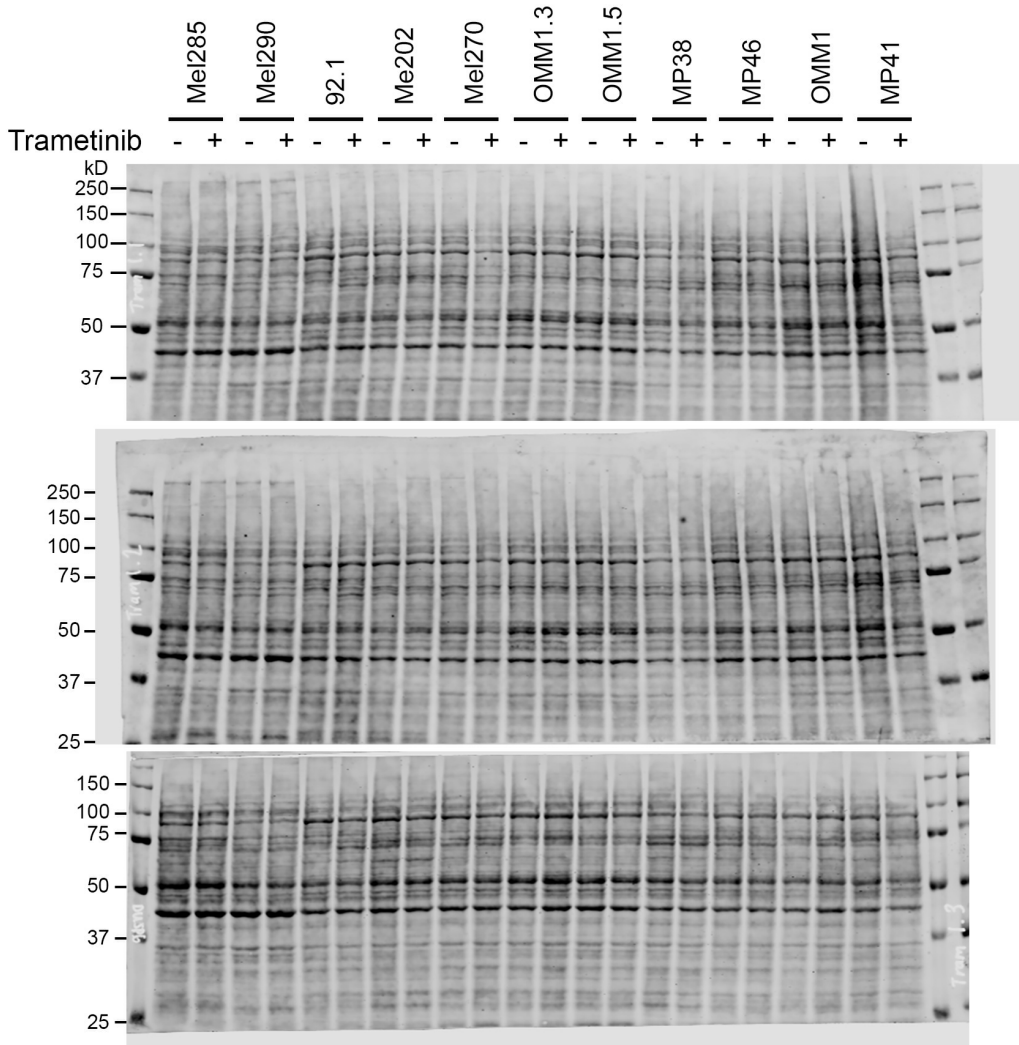

Figure S4: REVERT total protein stain

Blots showing REVERT total protein stain corresponding to Figure 2A. kD, kilodalton.

Figure S5

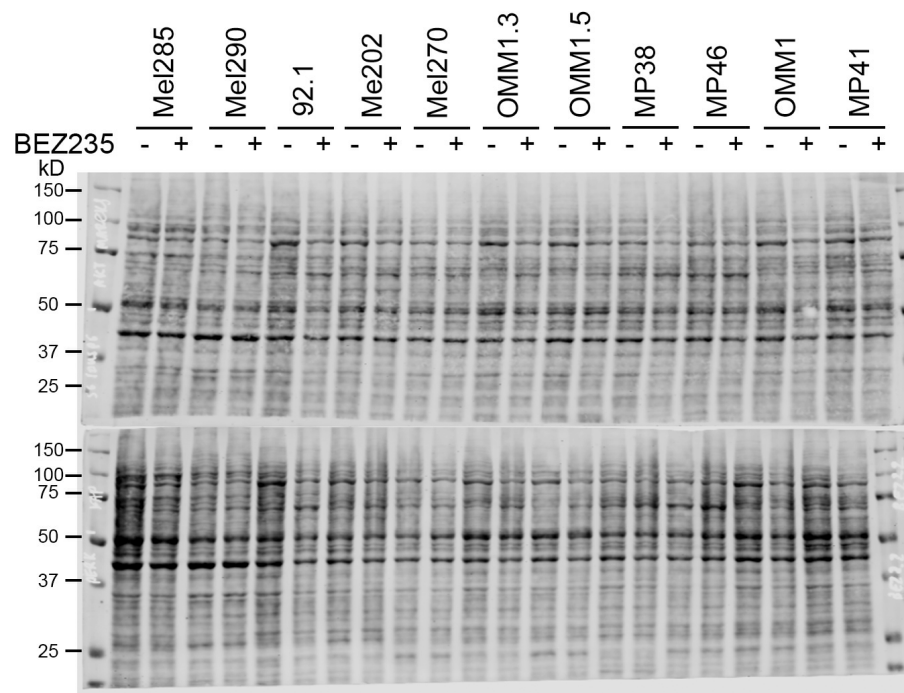

**Figure S5: REVERT total protein stain**

Blots showing REVERT total protein stain corresponding to Figure 3B. kD, kilodalton.

Figure S6

A

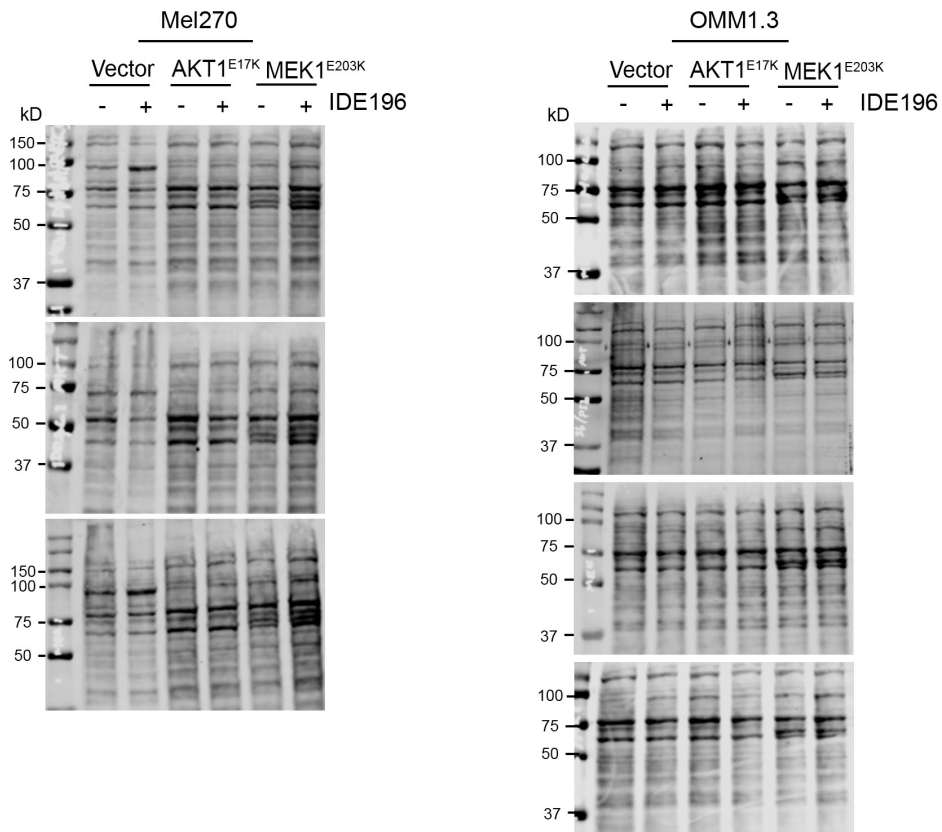

**Figure S6: REVERT total protein stain**

Blots showing REVERT total protein stain corresponding to Figure 4A. kD, kilodalton.

Figure S7

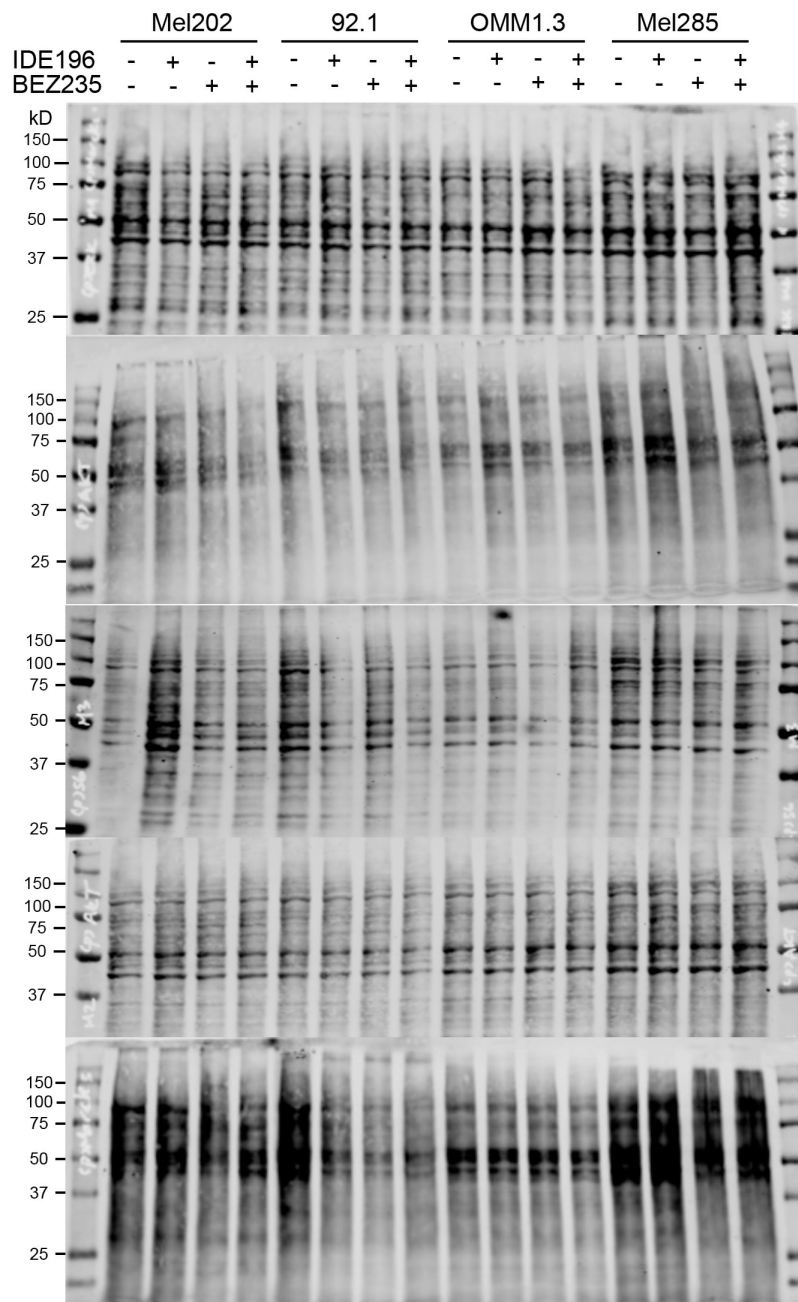

**Figure S7: REVERT total protein stain**

Blots showing REVERT protein stain corresponding to Figure 5A. kD, kilodalton.
