# Supplementary material for: PKC-independent PI3K signalling diminishes PKC inhibitor sensitivity in uveal melanoma
Source: PubMed Central journal article supplement (PMC10902289; doi:10.1038/s41389-024-00511-8), 2024-02-28
Supplement: 41389_2024_511_MOESM2_ESM.pdf [file 41389_2024_511_MOESM2_ESM.pdf]

**Table S1: Detailed characteristics of patients and tumour samples used in this study (subset of data derived from Park et al. Cancers 2021, 13:1740)**

| Pt ID | Age | Sex | ECOG PS | Mutation                 | Baseline LDH (U/L) | Site of disease         | Primary tumour type | PRE sample site | Treatment       | EDT sample site | Days from Treatment to EDT tissue sample | Best Response | PFS (mths) |
|-------|-----|-----|---------|--------------------------|--------------------|-------------------------|---------------------|-----------------|-----------------|-----------------|------------------------------------------|---------------|------------|
| 4     | 69  | F   | 0       | GNAQ <sup>R183Q</sup>    | 411                | Liver, lung, LN         | Iris                | Liver           | IDE196          | Liver           | 15                                       | SD ≥ 6 months | 9.3        |
| 9     | 57  | F   | 0       | GNA11 <sup>Q209L</sup>   | 186                | Liver                   | Unknown             | Liver           | IDE196          | Liver           | 12                                       | SD < 6 months | 3.7        |
| 10    | 67  | F   | 0       | CYSLTR2 <sup>L129Q</sup> | 233                | Liver, bone, spleen     | Choroidal           | Liver           | IDE196          | Liver           | 15                                       | PD            | 1.9        |
| 20    | 71  | M   | 0       | GNAQ <sup>Q209P</sup>    | 192                | Liver                   | Choroidal           | Liver           | IDE196          | Liver           | 15                                       | SD ≥ 6 months | 6.1        |
| 21    | 62  | M   | 0       | GNAQ <sup>Q209L</sup>    | 318                | Liver, bone             | Choroidal           | Liver           | IDE196          | Liver           | 14                                       | PD            | 3.5        |
| 12    | 67  | F   | 1       | GNA11 <sup>Q209L</sup>   | 389                | Liver, lung, bone, LN   | Choroidal           | Liver           | IDE196 + HDM201 | Liver           | 26                                       | PD            | 1.7        |
| 13    | 67  | F   | 0       | GNAQ <sup>Q209P</sup>    | 225                | Liver                   | Choroidal           | Liver           | IDE196 + HDM201 | Liver           | 29                                       | SD < 6 months | 5.4        |
| 14    | 55  | M   | 1       | GNAQ <sup>Q209P</sup>    | 454                | Liver, lung, LN         | Choroidal           | Liver           | IDE196 + HDM201 | Liver           | 29                                       | SD < 6 months | 3.8        |
| 15    | 73  | M   | 1       | GNAQ <sup>Q209P</sup>    | 835                | Liver, lung, LN, spleen | Choroidal           | Liver           | IDE196 + HDM201 | Liver           | 28                                       | SD < 6 months | 3.8        |
| 17    | 67  | M   | 0       | GNAQ <sup>R183Q</sup>    | 869                | Liver, spleen, bone     | Choroidal           | Liver           | IDE196 + HDM201 | Liver           | 27                                       | SD < 6 months | 3.9        |
| 24    | 65  | F   | 0       | GNAQ <sup>Q209P</sup>    | 226                | Liver                   | Choroidal           | Liver           | IDE196 + HDM201 | Liver           | 28                                       | SD < 6 months | 4.2        |

Age at start of treatment shown

SD, stable disease; PD, progressive disease

Sex: M, male; F, female

Site of disease: LN, lymph node

PRE, baseline sample; EDT, early during treatment sample

LDH, lactate dehydrogenase

ECOG PS, Eastern Cooperative Oncology Group Performance Status

Patient #17 had a 3 day dose interruption during the PRE-EDT sample period and was on treatment at the time of EDT sample collection.

PFS, progression free survival

**Table S2 Single sample geneset enrichment (ssGSEA) scores derived from the transcriptome data of patient matched PRE and EDT uveal melanoma biopsies**

| Patient ID                                 | 4        |          | 9        |          | 10       |          | 20       |          | 21       |          | 12       |          | 13       |          | 14       |          | 15       |          |
|--------------------------------------------|----------|----------|----------|----------|----------|----------|----------|----------|----------|----------|----------|----------|----------|----------|----------|----------|----------|----------|
| Biopsy timing                              | PRE      | EDT      | PRE      | EDT      | PRE      | EDT      | PRE      | EDT      | PRE      | EDT      | PRE      | EDT      | PRE      | EDT      | PRE      | EDT      | PRE      | EDT      |
| HALLMARK_TNFA_SIGNALING_VIA_NFKB           | -326.97  | -1214.04 | -259.04  | -328.26  | -560.44  | -698.45  | -104.49  | -399.84  | 392.16   | 73.04    | 1026.15  | 99.46    | 535.53   | -206.43  | -783.37  | -961.66  | 1111.08  | 775.60   |
| HALLMARK_HYPOXIA                           | 2091.52  | 1555.28  | 1010.35  | 1595.82  | 822.98   | 1311.01  | 1907.34  | 1459.01  | 2172.38  | 1216.35  | 1938.10  | 1717.84  | 2034.32  | 2205.90  | 858.64   | 157.60   | 2440.65  | 2026.58  |
| HALLMARK_CHOLESTEROL_HOMEOSTASIS           | 2376.13  | 4218.12  | 1868.82  | 3399.24  | 1227.57  | 3445.29  | 2666.66  | 3276.35  | 2813.86  | 1574.95  | 3299.86  | 2789.96  | 2944.38  | 3789.19  | 1553.67  | 938.07   | 2917.75  | 2473.76  |
| HALLMARK_MITOTIC_SPINDLE                   | 292.73   | -762.72  | -1020.52 | -941.17  | 172.24   | -1013.64 | -818.54  | -941.17  | 118.89   | -216.87  | 87.84    | -229.06  | -391.40  | -1050.06 | -222.38  | -121.82  | 90.60    | -279.64  |
| HALLMARK_WNT_BETA_CATENIN_SIGNALING        | -283.76  | -888.20  | -466.86  | -477.45  | 346.54   | -643.57  | -808.02  | -568.21  | -131.30  | -138.47  | -727.89  | -992.91  | -799.72  | -1609.01 | -137.60  | 26.97    | -61.80   | -347.25  |
| HALLMARK_TGF_BETA_SIGNALING                | -367.74  | -697.79  | -579.08  | -373.66  | -1077.12 | -848.72  | -106.74  | 70.51    | 604.43   | 772.37   | 541.40   | -125.21  | 555.76   | 218.10   | -549.88  | -437.70  | 1404.71  | 628.60   |
| HALLMARK_IL6_JAK_STAT3_SIGNALING           | 74.30    | -333.63  | -261.05  | -611.47  | -894.23  | -359.52  | 601.39   | 682.21   | -22.30   | -80.03   | 2035.18  | 445.16   | 68.29    | 659.96   | -1652.26 | -1881.85 | 707.32   | -298.24  |
| HALLMARK_DNA_REPAIR                        | 3328.29  | 1657.79  | 2218.61  | 1830.97  | 2189.47  | 1468.98  | 1704.04  | 1415.99  | 2874.60  | 2069.07  | 2176.65  | 2403.65  | 2902.24  | 1696.24  | 2406.71  | 2187.92  | 2304.96  | 2826.48  |
| HALLMARK_G2M_CHECKPOINT                    | 1493.56  | -662.57  | -1317.51 | -1545.11 | 239.42   | -1211.83 | -318.50  | -1375.40 | 580.26   | -482.84  | 654.98   | 843.88   | 1080.37  | -717.91  | 151.40   | 232.46   | -528.95  | -80.53   |
| HALLMARK_APOPTOSIS                         | 2526.52  | 1971.65  | 1719.73  | 2118.08  | 1616.70  | 2010.09  | 2060.11  | 2542.62  | 2693.51  | 1969.00  | 3274.98  | 2340.24  | 2490.79  | 2496.54  | 1274.60  | 747.30   | 3540.71  | 2682.45  |
| HALLMARK_NOTCH_SIGNALING                   | 456.21   | -251.29  | -89.07   | -264.75  | 236.91   | -330.68  | -503.47  | -426.48  | 1096.00  | 636.03   | 553.82   | 569.95   | 990.68   | -56.07   | -1196.85 | -1201.86 | 885.06   | 455.37   |
| HALLMARK_ADIPOGENESIS                      | 3235.57  | 4820.45  | 3238.28  | 3928.41  | 2554.88  | 3908.47  | 4535.71  | 4525.50  | 3545.43  | 2701.60  | 4150.63  | 4350.47  | 4299.42  | 5016.18  | 2641.90  | 2325.25  | 3575.27  | 3875.12  |
| HALLMARK_ESTROGEN_RESPONSE_EARLY           | -1254.85 | -453.27  | -868.75  | -2.53    | -991.67  | -362.38  | -262.41  | -418.66  | -390.93  | -700.90  | -817.45  | -824.95  | -671.00  | -221.81  | -1075.76 | -967.94  | -423.66  | -431.06  |
| HALLMARK_ESTROGEN_RESPONSE_LATE            | 155.24   | 2633.94  | -89.26   | 1830.40  | -882.75  | 1782.83  | 2342.83  | 2549.55  | 205.63   | -287.39  | 971.37   | 1226.68  | 1031.37  | 3019.27  | -734.43  | -718.63  | 197.20   | 778.53   |
| HALLMARK_ANDROGEN_RESPONSE                 | 2173.26  | 2821.02  | 2312.49  | 2682.82  | 1719.53  | 3369.70  | 3734.07  | 2333.70  | 2845.94  | 2367.71  | 4231.66  | 3587.07  | 2983.75  | 3767.40  | 623.16   | 509.35   | 4168.15  | 3173.67  |
| HALLMARK_MYOGENESIS                        | 1800.89  | 998.64   | 1150.64  | 1619.36  | 1118.80  | 1271.59  | 748.68   | 1381.57  | 2126.02  | 1803.49  | 1393.31  | 1416.23  | 1823.30  | 706.01   | 522.09   | 460.85   | 3089.88  | 2010.47  |
| HALLMARK_PROTEIN_SECRETION                 | 3833.33  | 1755.15  | 2919.48  | 2661.57  | 2575.42  | 2474.11  | 2898.17  | 1525.57  | 3986.75  | 3112.85  | 3814.31  | 3409.33  | 3625.68  | 2656.31  | 2478.45  | 2082.56  | 4074.76  | 3775.61  |
| HALLMARK_INTERFERON_ALPHA_RESPONSE         | 4012.98  | 2167.05  | 3837.28  | 3225.90  | 3564.38  | 4268.66  | 3903.79  | 3129.72  | 4017.13  | 3587.30  | 5576.43  | 3574.61  | 3146.43  | 3165.98  | 504.26   | 63.96    | 5363.79  | 3451.79  |
| HALLMARK_INTERFERON_GAMMA_RESPONSE         | 2884.55  | 1504.31  | 2816.86  | 2252.65  | 1959.80  | 3135.49  | 3135.84  | 2559.09  | 2734.70  | 2336.51  | 5061.78  | 2701.22  | 2013.97  | 2479.70  | -631.78  | -819.55  | 4448.10  | 2301.29  |
| HALLMARK_APICAL_JUNCTION                   | 1556.92  | -61.07   | 563.14   | 578.86   | 833.58   | 344.48   | 12.31    | 866.72   | 1511.63  | 1127.28  | 1229.16  | 672.49   | 800.25   | 295.61   | 223.28   | 187.19   | 2029.00  | 908.44   |
| HALLMARK_APICAL_SURFACE                    | 1124.10  | -1288.09 | -444.72  | -156.24  | 705.83   | -495.34  | -947.07  | -555.56  | 730.45   | 351.04   | 1002.11  | -381.89  | -439.66  | -1537.47 | -800.82  | -942.49  | 1430.09  | -159.85  |
| HALLMARK_HEDGEHOG_SIGNALING                | -1345.52 | 841.89   | -41.57   | 982.40   | -1115.69 | -364.72  | 221.36   | 665.25   | -875.92  | -893.14  | -761.97  | -941.82  | -1347.68 | -287.80  | -930.30  | -743.12  | -1086.26 | -938.78  |
| HALLMARK_COMPLEX                           | 944.30   | 4467.55  | 2205.29  | 3640.16  | -130.91  | 3605.47  | 4259.93  | 4735.13  | 1636.80  | 920.43   | 4301.57  | 3345.35  | 2577.39  | 4869.44  | 329.10   | 6.70     | 2350.41  | 1650.05  |
| HALLMARK_UNFOLDED_PROTEIN_RESPONSE         | 4300.57  | 2172.98  | 3602.09  | 2930.95  | 4023.27  | 3297.84  | 3433.48  | 2263.71  | 4295.15  | 3260.37  | 3980.12  | 4037.01  | 4275.79  | 3060.34  | 4137.80  | 3918.44  | 3915.78  | 4168.28  |
| HALLMARK_PI3K_AKT_MTOR_SIGNALING           | 2899.95  | 1301.68  | 1683.33  | 1416.52  | 1708.15  | 1486.43  | 1566.99  | 1286.33  | 2829.67  | 1734.28  | 3219.61  | 1950.10  | 2344.16  | 1896.30  | 1557.27  | 1058.53  | 2829.30  | 1915.93  |
| HALLMARK_MTORC1_SIGNALING                  | 3962.24  | 2524.49  | 2636.93  | 2382.39  | 2359.98  | 2598.46  | 3171.98  | 1924.13  | 3965.90  | 2404.95  | 3927.62  | 3676.78  | 3993.89  | 2917.28  | 2587.60  | 1993.33  | 3455.21  | 3262.24  |
| HALLMARK_E2F_TARGETS                       | 2451.55  | -650.06  | -681.35  | -1383.04 | 752.69   | -1089.43 | 40.72    | -1362.39 | 1108.68  | -349.38  | 569.36   | 1566.34  | 1886.33  | -1045.53 | 861.79   | 902.09   | -466.90  | 641.03   |
| HALLMARK_MYC_TARGETS_V1                    | 6294.67  | 4391.81  | 5780.67  | 5077.47  | 6245.37  | 5588.65  | 5835.08  | 4274.78  | 6320.39  | 5620.39  | 6109.78  | 6301.29  | 6407.76  | 4944.72  | 6348.13  | 6230.25  | 5935.07  | 6224.63  |
| HALLMARK_MYC_TARGETS_V2                    | 3573.71  | 1086.70  | 2304.66  | 1468.84  | 3334.00  | 1780.80  | 2027.29  | 517.05   | 3298.28  | 1468.77  | 2296.73  | 2651.70  | 3204.79  | 1135.34  | 3227.09  | 3087.83  | 2105.57  | 2715.35  |
| HALLMARK_EPITHELIAL_MESENCHYMAL_TRANSITION | 1351.29  | -361.15  | 933.94   | 1387.93  | 202.23   | 338.19   | 615.89   | 1410.64  | 2725.62  | 2233.89  | 2365.15  | 2154.17  | 2224.20  | 1378.57  | -2.09    | -191.48  | 3488.20  | 2165.36  |
| HALLMARK_INFLAMMATORY_RESPONSE             | -914.01  | -1544.61 | -930.18  | -1308.93 | -1683.46 | -958.27  | -779.76  | -573.05  | -897.45  | -743.52  | 582.67   | -910.47  | -551.87  | -342.72  | -2424.71 | -2458.34 | 311.27   | -924.13  |
| HALLMARK_XENOBIOTIC_METABOLISM             | -741.00  | 5856.16  | 1359.71  | 4669.59  | -1275.09 | 4614.61  | 5040.66  | 5593.77  | -441.84  | -997.10  | 3430.02  | 3352.57  | 1795.48  | 5802.36  | -698.93  | -900.72  | -408.27  | 1013.73  |
| HALLMARK_FATTY_ACID_METABOLISM             | 2077.87  | 4815.06  | 1983.18  | 3746.62  | 1162.78  | 3921.86  | 4100.71  | 4086.65  | 1999.67  | 1047.46  | 3388.60  | 3388.32  | 3132.99  | 4869.40  | 1068.63  | 898.92   | 2316.24  | 2495.76  |
| HALLMARK_OXIDATIVE_PHOSPHORYLATION         | 5797.01  | 5470.25  | 5403.90  | 5315.45  | 5255.34  | 5617.79  | 5986.03  | 5062.44  | 5868.46  | 4912.57  | 5596.35  | 5991.37  | 6285.51  | 5732.66  | 5263.17  | 4869.98  | 5757.55  | 6107.05  |
| HALLMARK_GLYCOLYSIS                        | 2525.54  | 2346.58  | 1531.27  | 2083.32  | 1349.58  | 2136.47  | 2567.40  | 1811.07  | 2882.12  | 1603.28  | 2508.70  | 2660.85  | 2844.77  | 2524.84  | 1408.34  | 791.99   | 2362.83  | 2446.18  |
| HALLMARK_REACTIVE_OXYGEN_SPECIES_PATHWAY   | 5132.59  | 5419.14  | 4527.40  | 5066.24  | 4298.05  | 5128.57  | 5217.44  | 5183.23  | 5190.89  | 4430.89  | 5794.28  | 5343.32  | 5265.09  | 5261.35  | 3696.70  | 2787.67  | 5229.36  | 4951.71  |
| HALLMARK_P53_PATHWAY                       | 2961.50  | 1927.48  | 2749.49  | 2513.27  | 2991.91  | 2583.22  | 2640.86  | 2178.00  | 3041.05  | 2308.78  | 2889.48  | 3143.93  | 3249.41  | 2819.93  | 2742.02  | 2434.66  | 3276.18  | 4206.55  |
| HALLMARK_UV_RESPONSE_UP                    | 2220.47  | 1496.29  | 1764.36  | 2245.18  | 1825.62  | 2313.43  | 2122.56  | 1836.56  | 2264.82  | 1471.54  | 2666.92  | 1994.02  | 2459.61  | 2067.94  | 1558.13  | 1245.92  | 2257.22  | 1994.29  |
| HALLMARK_UV_RESPONSE_DN                    | -603.45  | -793.81  | -743.18  | -372.47  | -674.67  | -501.38  | -138.42  | -376.52  | 128.73   | 147.24   | -277.75  | -699.64  | -150.21  | -118.74  | -729.93  | -508.77  | 758.69   | 110.29   |
| HALLMARK_ANGIOGENESIS                      | 1192.15  | 3577.33  | 1349.67  | 3670.30  | -1264.31 | 2733.54  | 3087.86  | 3873.48  | 2806.57  | 2242.13  | 3345.54  | 3050.54  | 2772.01  | 4399.37  | -1286.24 | -1105.59 | 3825.04  | 2911.25  |
| HALLMARK_HEME_METABOLISM                   | 899.46   | 2790.37  | 1610.45  | 2263.96  | 845.25   | 1732.53  | 2402.03  | 2869.69  | 1138.22  | 1057.33  | 2190.18  | 1993.91  | 1718.54  | 2587.72  | 658.60   | 569.38   | 1446.85  | 1468.78  |
| HALLMARK_COAGULATION                       | 885.50   | 6216.31  | 3839.84  | 5830.09  | -1114.17 | 5545.63  | 5921.89  | 6280.12  | 1618.08  | 792.00   | 5096.86  | 5133.70  | 3849.91  | 6354.35  | 678.57   | 128.09   | 2269.13  | 2928.54  |
| HALLMARK_IL2_STAT5_SIGNALING               | 1535.76  | 219.26   | 725.87   | 880.07   | 486.01   | 812.03   | 1067.68  | 653.16   | 1570.32  | 852.50   | 1788.97  | 1077.08  | 1583.31  | 987.41   | 119.21   | -310.72  | 2380.03  | 1414.76  |
| HALLMARK_BILE_ACID_METABOLISM              | -1354.39 | 5590.78  | 231.32   | 4052.49  | -1607.73 | 4126.20  | 4548.77  | 4959.25  | -1400.69 | -1565.35 | 1752.94  | 1951.26  | 758.77   | 5496.65  | -1506.27 | -1608.87 | -869.68  | -17.79   |
| HALLMARK_PEROXISOME                        | 2437.05  | 6103.88  | 3211.06  | 5409.87  | 1362.31  | 5808.19  | 6131.86  | 5832.11  | 2269.72  | 1656.96  | 4429.75  | 4248.51  | 3741.60  | 6141.83  | 1293.91  | 1057.32  | 2212.64  | 2779.78  |
| HALLMARK_ALLOGRAFT_REJECTION               | 3840.16  | 612.34   | 3711.11  | 2448.12  | 3608.19  | 3730.14  | 3982.67  | 2323.31  | 3736.98  | 3351.73  | 5379.83  | 4681.92  | 4619.91  | 2725.71  | 3060.30  | 3324.86  | 4851.11  | 4361.06  |
| HALLMARK_SPERMATOGENESIS                   | -1053.89 | -1791.23 | -2730.27 | -2386.89 | -1377.26 | -2229.01 | -1803.72 | -2034.87 | -1425.04 | -2045.54 | -2081.62 | -1467.28 | -1173.11 | -1823.50 | -796.14  | -1046.01 | -1802.52 | -1501.31 |
| HALLMARK_KRAS_SIGNALING_UP                 | -1751.15 | 950.99   | -875.70  | 204.98   | -2068.89 | 118.04   | 913.68   | 1331.10  | -1297.24 | -1013.41 | 1077.06  | 619.39   | -263.17  | 1961.70  | -2290.00 | -2226.27 | -375.55  | -153.75  |
| HALLMARK_KRAS_SIGNALING_DN                 | -2302.13 | -16.15   | -1868.83 | -437.90  | -2090    |          |          |          |          |          |          |          |          |          |          |          |          |          |

| 17       | 17       | 24       | 24       |            |            |
|----------|----------|----------|----------|------------|------------|
| PRE      | EDT      | PRE      | EDT      | Median PRE | Median EDT |
| 130.51   | -176.30  | 227.19   | -408.57  | 130.51     | -328.26    |
| 1500.01  | 1248.62  | 1295.57  | 1886.17  | 1907.34    | 1555.28    |
| 2283.70  | 2166.76  | 2285.02  | 4075.04  | 2376.13    | 3276.35    |
| -537.73  | 82.13    | -1011.79 | -1027.77 | -222.38    | -762.72    |
| -831.59  | -190.64  | -514.21  | -787.93  | -466.86    | -568.21    |
| -534.21  | 152.23   | -361.31  | -434.01  | -361.31    | -125.21    |
| -76.45   | -237.94  | 417.29   | 614.84   | 68.29      | -237.94    |
| 2402.91  | 2160.87  | 2029.51  | 1677.06  | 2304.96    | 1830.97    |
| 556.43   | -205.17  | -411.89  | -411.00  | 239.42     | -482.84    |
| 2064.87  | 2221.95  | 2233.98  | 2595.67  | 2233.98    | 2221.95    |
| 38.68    | 193.73   | -898.33  | -659.46  | 236.91     | -251.29    |
| 3641.33  | 2870.65  | 3541.47  | 4760.49  | 3545.43    | 3928.41    |
| -545.46  | -336.25  | -783.67  | 45.21    | -783.67    | -418.66    |
| 492.67   | -227.41  | -38.72   | 2679.55  | 197.20     | 1782.83    |
| 1989.69  | 1873.01  | 2675.63  | 3601.30  | 2675.63    | 2821.02    |
| 1602.39  | 2110.28  | 778.40   | 1518.13  | 1393.31    | 1416.23    |
| 3121.36  | 3200.26  | 2748.98  | 2758.27  | 3121.36    | 2661.57    |
| 920.61   | 1195.62  | 3753.52  | 4108.51  | 3837.28    | 3225.90    |
| 88.42    | 38.24    | 2795.30  | 3107.93  | 2795.30    | 2336.51    |
| 495.47   | 684.16   | 290.42   | 65.80    | 800.25     | 578.86     |
| -168.25  | 833.59   | -121.97  | -343.53  | -121.97    | -381.89    |
| -1626.30 | -967.87  | -760.76  | 330.34   | -930.30    | -364.72    |
| 1354.17  | -100.61  | 2592.10  | 4448.43  | 2205.29    | 3605.47    |
| 4339.15  | 4278.46  | 4519.60  | 3640.83  | 4137.80    | 3297.84    |
| 1114.64  | 1323.78  | 1883.23  | 1854.99  | 1883.23    | 1486.43    |
| 3182.11  | 2232.68  | 3076.62  | 3256.93  | 3182.11    | 2524.49    |
| 1705.04  | 352.42   | 79.93    | -497.21  | 752.69     | -497.21    |
| 6380.90  | 6219.19  | 6376.42  | 5865.04  | 6294.67    | 5620.39    |
| 3168.41  | 2459.21  | 3287.53  | 2587.89  | 3204.79    | 1780.80    |
| 1754.52  | 1468.22  | 1277.88  | 745.24   | 1351.29    | 1387.93    |
| -1732.20 | -2323.66 | -14.74   | -707.56  | -897.45    | -924.13    |
| 1443.67  | -1083.67 | 2112.98  | 5565.16  | 1359.71    | 4614.61    |
| 2449.93  | 1364.67  | 2439.40  | 4557.09  | 2316.24    | 3746.62    |
| 5936.52  | 5297.85  | 5553.50  | 5703.47  | 5757.55    | 5470.25    |
| 2391.67  | 1727.84  | 1704.75  | 2776.17  | 2391.67    | 2136.47    |
| 4324.07  | 4232.79  | 4799.87  | 5353.67  | 5132.59    | 5128.57    |
| 3092.01  | 2986.59  | 3352.22  | 2601.20  | 2991.91    | 2583.22    |
| 2084.67  | 1640.38  | 2027.69  | 2476.17  | 2122.56    | 1994.02    |
| 44.24    | 435.42   | -553.04  | -157.69  | -277.75    | -372.47    |
| 824.65   | -766.47  | 1387.29  | 3757.05  | 1387.29    | 3050.54    |
| 1339.74  | 1157.69  | 1884.42  | 2465.31  | 1446.85    | 1993.91    |
| 3479.89  | -45.40   | 4041.45  | 6135.95  | 3479.89    | 5545.63    |
| 728.06   | 477.43   | 1258.42  | 1182.87  | 1258.42    | 852.50     |
| 548.17   | -1389.16 | 785.77   | 5183.16  | 231.32     | 4052.49    |
| 3406.96  | 1609.66  | 3632.87  | 6043.45  | 3211.06    | 5409.87    |
| 3827.14  | 3535.22  | 4973.95  | 3132.27  | 3840.16    | 3324.86    |
| -792.75  | -1250.13 | -1184.22 | -1352.17 | -1377.26   | -1791.23   |
| -1045.42 | -1782.00 | -15.37   | 1279.34  | -875.70    | 204.98     |
| -2583.52 | -2336.99 | -2021.69 | 24.04    | -2179.27   | -437.90    |
| -190.02  | -1360.16 | -618.13  | 366.36   | -268.75    | -749.55    |
| -555.82  | -1759.29 | -814.94  | -1167.89 | -833.22    | -1315.36   |
| 329.25   | -1307.88 | -234.62  | -711.57  | -58.25     | -1261.39   |
| 1823.50  | 2163.75  | 1422.19  | 814.31   | 1673.35    | 831.33     |

**Table S3 Pearson correlation values between the Hallmark\_MYC\_TARGETS\_V2 with proliferation signature and other genesets**

| Geneset                                    | Pearson correlation | P-value | FDR(BH) |
|--------------------------------------------|---------------------|---------|---------|
| HALLMARK_MYC_TARGETS_V2                    | 1                   | 0       | 0.01    |
| HALLMARK_MYC_TARGETS_V1                    | 0.92                | 0       | 0.01    |
| HALLMARK_UNFOLDED_PROTEIN_RESPONSE         | 0.91                | 0       | 0.01    |
| HALLMARK_E2F_TARGETS                       | 0.83                | 0       | 0.01    |
| HALLMARK_G2M_CHECKPOINT                    | 0.75                | 0       | 0.01    |
| HALLMARK_DNA_REPAIR                        | 0.75                | 0       | 0.01    |
| HALLMARK_SPERMATOGENESIS                   | 0.71                | 0       | 0.01    |
| MAPK_UP#1                                  | 0.67                | 0       | 0.01    |
| YAP1_UP                                    | 0.64                | 0       | 0.01    |
| HALLMARK_P53_PATHWAY                       | 0.57                | 0       | 0.01    |
| HALLMARK_ALLOGRAFT_REJECTION               | 0.55                | 0.01    | 0.02    |
| HALLMARK_MITOTIC_SPINDLE                   | 0.52                | 0.01    | 0.02    |
| HALLMARK_PROTEIN_SECRETION                 | 0.48                | 0.03    | 0.06    |
| HALLMARK_MTORC1_SIGNALING                  | 0.46                | 0.03    | 0.06    |
| HALLMARK_WNT_BETA_CATENIN_SIGNALING        | 0.41                | 0.07    | 0.12    |
| HALLMARK_APICAL_SURFACE                    | 0.36                | 0.11    | 0.18    |
| HALLMARK_OXIDATIVE_PHOSPHORYLATION         | 0.31                | 0.2     | 0.31    |
| HALLMARK_PI3K_AKT_MTOR_SIGNALING           | 0.29                | 0.18    | 0.28    |
| MAPK_UP#2                                  | 0.19                | 0.44    | 0.59    |
| HALLMARK_TNFA_SIGNALING_VIA_NFKB           | 0.18                | 0.43    | 0.59    |
| HALLMARK_APICAL_JUNCTION                   | 0.16                | 0.47    | 0.61    |
| HALLMARK_UV_RESPONSE_UP                    | 0.11                | 0.59    | 0.68    |
| HALLMARK_IL2_STATS5_SIGNALING              | 0.11                | 0.58    | 0.68    |
| HALLMARK_NOTCH_SIGNALING                   | 0.09                | 0.71    | 0.77    |
| HALLMARK_EPITHELIAL_MESENCHYMAL_TRANSITION | 0.04                | 0.84    | 0.86    |
| HALLMARK_MYOGENESIS                        | 0.04                | 0.82    | 0.85    |
| HALLMARK_GLYCOLYSIS                        | -0.02               | 0.96    | 0.96    |
| HALLMARK_UV_RESPONSE_DN                    | -0.07               | 0.74    | 0.79    |
| HALLMARK_PANCREAS_BETA_CELLS               | -0.09               | 0.68    | 0.75    |
| HALLMARK_HYPOXIA                           | -0.13               | 0.65    | 0.73    |
| HALLMARK_TGF_BETA_SIGNALING                | -0.14               | 0.57    | 0.68    |
| HALLMARK_INTERFERON_ALPHA_RESPONSE         | -0.16               | 0.5     | 0.63    |
| HALLMARK_APOPTOSIS                         | -0.16               | 0.53    | 0.65    |
| HALLMARK_INFLAMMATORY_RESPONSE             | -0.24               | 0.32    | 0.44    |
| HALLMARK_INTERFERON_GAMMA_RESPONSE         | -0.25               | 0.28    | 0.4     |
| HALLMARK_IL6_JAK_STAT3_SIGNALING           | -0.29               | 0.21    | 0.31    |
| HALLMARK_ANDROGEN_RESPONSE                 | -0.35               | 0.12    | 0.2     |
| HALLMARK_REACTIVE_OXYGEN_SPECIES_PATHWAY   | -0.35               | 0.1     | 0.17    |
| HALLMARK_ADIPOGENESIS                      | -0.51               | 0.01    | 0.03    |
| HALLMARK_CHOLESTEROL_HOMEOSTASIS           | -0.54               | 0.01    | 0.02    |
| HALLMARK_ESTROGEN_RESPONSE_EARLY           | -0.54               | 0       | 0.01    |
| HALLMARK_FATTY_ACID_METABOLISM             | -0.59               | 0       | 0.01    |
| HALLMARK_COAGULATION                       | -0.6                | 0       | 0.01    |
| HALLMARK_ANGIOGENESIS                      | -0.61               | 0       | 0.01    |
| HALLMARK_PEROXISOME                        | -0.62               | 0       | 0.01    |
| HALLMARK_XENOBIOTIC_METABOLISM             | -0.65               | 0       | 0.01    |
| HALLMARK_COMPLEMENT                        | -0.65               | 0       | 0.01    |
| HALLMARK_KRAS_SIGNALING_UP                 | -0.66               | 0       | 0.01    |
| HALLMARK_ESTROGEN_RESPONSE_LATE            | -0.67               | 0       | 0.01    |
| HALLMARK_BILE_ACID_METABOLISM              | -0.69               | 0       | 0.01    |
| HALLMARK_HEME_METABOLISM                   | -0.7                | 0       | 0.01    |
| HALLMARK_HEDGEHOG_SIGNALING                | -0.73               | 0       | 0.01    |
| HALLMARK_KRAS_SIGNALING_DN                 | -0.74               | 0       | 0.01    |

FDR(BH), P-value adjusted for false discovery rate (Benjamini Hochberg method)

MAPK\_UP#1 signature derived from Pratilas et al. 2009. Cancer Res 68:9375

MAPK\_UP#2 signature derived from Nazarian et al. 2010. Nature 468:973

YAP1\_UP signature derived from Molecular Signatures Databse c6 v2023.1

**Table S4 Characteristics and treatment response data for uveal melanoma cells**

| Cell Lines | Genotype           | 1µM IDE196 <sup>a</sup> |                      | 5µM IDE196 <sup>a</sup> |                      |
|------------|--------------------|-------------------------|----------------------|-------------------------|----------------------|
|            |                    | Change in % sub-G1      | % S-phase inhibition | Change in % sub-G1      | % S-phase inhibition |
| Mel285     | -                  | 0.0                     | 2.1                  | -0.2                    | 8.7                  |
| Mel290     | -                  | 0.0                     | 13.4                 | 0.1                     | 16.9                 |
| 92.1       | GNAQ Q209L         | 3.2                     | 87.0                 | 14.8                    | 95.9                 |
| Mel202     | GNAQ Q209L & R210K | 1.3                     | 61.5                 | 3.4                     | 64.4                 |
| Mel270     | GNAQ Q209P         | 65.0                    | 78.2                 | 60.5                    | 72.2                 |
| OMM1.3     | GNAQ Q209P         | 8.4                     | 83.9                 | 3.6                     | 91.4                 |
| OMM1.5     | GNAQ Q209P         | 2.6                     | 85.0                 | 2.6                     | 88.0                 |
| MP38       | GNAQ Q209L         | 0.4                     | 52.3                 | 0.9                     | 71.2                 |
| MP46       | GNAQ Q209L         | 1.9                     | 50.1                 | 1.7                     | 60.1                 |
| OMM1       | GNA11 Q209L        | 36.6                    | 22.4                 | 50.2                    | 46.5                 |
| MP41       | GNA11 Q209L        | 1.5                     | 82.3                 | 2.2                     | 87.4                 |

| 5nM Trametinib     |                      | 10nM Trametinib |                      |
|--------------------|----------------------|-----------------|----------------------|
| Change in % sub-G1 | % S-phase inhibition | % cell death    | % S-phase inhibition |
| -0.5               | 28.7                 | -0.1            | 25.2                 |
| 0.0                | 34.6                 | 0.0             | 44.1                 |
| 0.1                | 29.5                 | 1.0             | 42.8                 |
| 0.0                | 42.1                 | 0.3             | 53.9                 |
| 18.4               | 64.2                 | 33.6            | 63.5                 |
| 0.2                | 36.7                 | 0.2             | 45.9                 |
| 0.0                | 30.8                 | 0.0             | 41.6                 |
| 0.3                | 59.4                 | 0.6             | 74.6                 |
| 0.3                | 5.0                  | 0.7             | 15.1                 |
| 3.7                | 14.5                 | 12.7            | 21.6                 |
| 0.0                | 7.4                  | -0.1            | 18.4                 |

| 500nM BEZ235       |                      | 2000nM BEZ235      |                      |
|--------------------|----------------------|--------------------|----------------------|
| Change in % sub-G1 | % S-phase inhibition | Change in % sub-G1 | % S-phase inhibition |
| 0.0                | 9.0                  | 0.1                | 27.2                 |
| 0.0                | 89.3                 | 0.0                | 90.3                 |
| 1.1                | 52.5                 | 5.1                | 86.9                 |
| 0.8                | 69.0                 | 2.3                | 82.4                 |
| 13.5               | 74.8                 | 19.6               | 71.0                 |
| 0.5                | 76.3                 | 0.8                | 77.9                 |
| 0.1                | 19.9                 | 0.4                | 32.7                 |
| 0.6                | 63.5                 | 0.9                | 52.4                 |
| 0.8                | 19.1                 | 0.9                | 13.0                 |
| 59.9               | 6.5                  | 59.6               | 17.4                 |
| 0.2                | -2.8                 | 0.4                | 2.8                  |

<sup>a</sup>Data derived from Park et al. 2020 Cancer Gene Ther 29:1384-1393

Data are the average of at least three biological replicates

% S-phase inhibition = (percentage of S-phase in the control-treated cells – percentage of S-phase in drug-treated cells) / (percentage of S-phase in the control-treated cells) x100

Change in % sub-G1 = % sub G1 in drug-treated cells - % sub-G1 in control-treated cells

- no detectable mutation

**Table S5 Synergy parameters and CI values for UM cell lines treated with a combination of IDE196 and BEZ235**

| IDE196 + BEZ235 (4:1) |            |         |         |                |                |                |
|-----------------------|------------|---------|---------|----------------|----------------|----------------|
|                       | Parameters |         |         | CI values at   |                |                |
|                       | $D_m$      | $m$     | $r$     | $ED_{50}$      | $ED_{75}$      | $ED_{90}$      |
| <b>MEL202</b>         | 3.31644    | 1.50540 | 0.97955 | <b>0.07990</b> | <b>0.04366</b> | <b>0.02699</b> |
| <b>92.1</b>           | 2.96453    | 1.2727  | 0.99679 | <b>0.26926</b> | <b>0.26142</b> | <b>0.2549</b>  |
| <b>OMM1</b>           | 0.13446    | 0.47612 | 0.84951 | <b>0.06236</b> | <b>0.01187</b> | <b>0.01286</b> |
| <b>MP41</b>           | 10.0056    | 0.88891 | 0.99485 | <b>0.24898</b> | <b>0.34308</b> | <b>0.47343</b> |

Data shown were derived from average sub-G1 drug-treated – average sub G1 vehicle-treated cells; 3-4 independent experiments per cell line

**D<sub>m</sub>**, median effective dose; **m**, slope; **r**, linear regression coefficient; **CI**, combination index

**ED<sub>50</sub>**, dose effective in 50% of the population; **ED<sub>75</sub>**, dose effective in 75% of the population;

**ED<sub>90</sub>**, dose effective in 90% of the population

Median effect curves for OMM13, Mel290, Mel285 had negative slopes and could not be analysed for synergy
